# Supplementary material for: Water-soluble inclusion complex of fullerene with γ-cyclodextrin polymer for photodynamic therapy
Source: Royal Society of Chemistry journal article supplement (doi:10.1039/c4tb00560k), 2014-01-01
Supplement: c4tb00560k1.pdf [file c4tb00560k1.pdf]

## Electronic Supplementary Information

for

### **Water-soluble inclusion complex of fullerene with $\gamma$ -cyclodextrin polymer for photodynamic therapy**

Wang Zhang,<sup>abc</sup> Xiangdong Gong,<sup>a</sup> Chang Liu,<sup>d</sup> Yuanzhe Piao,<sup>\*bc</sup> Yun Sun<sup>\*d</sup> and  
Guowang Diao<sup>\*a</sup>

<sup>a</sup> College of Chemistry and Chemical Engineering, Yangzhou University, Yangzhou, 225002 Jiangsu, P. R. China. E-mail: gwdiao@yzu.edu.cn; Tel: +86 51487975436, fax: +86 514 87975244

<sup>b</sup> Graduate School of Convergence Science and Technology, Seoul National University, Seoul, 151-742, Republic of Korea. E-mail: parkat9@snu.ac.kr; Tel: +82 318889148

<sup>c</sup> Advanced Institutes of Convergence Technology, Suwon, 443-270, Republic of Korea.

<sup>d</sup> College of Medicine, Yangzhou University, Yangzhou, 225002 Jiangsu, P. R. China. E-mail: ysun@yzu.edu.cn; Tel: +86 51487341733

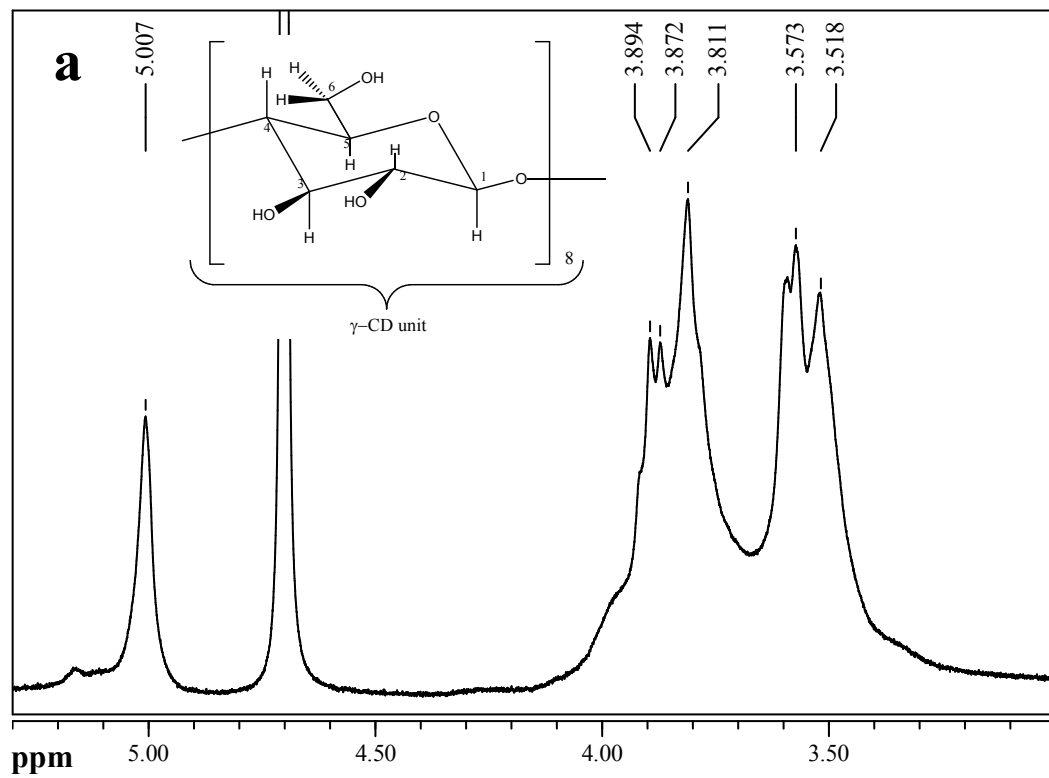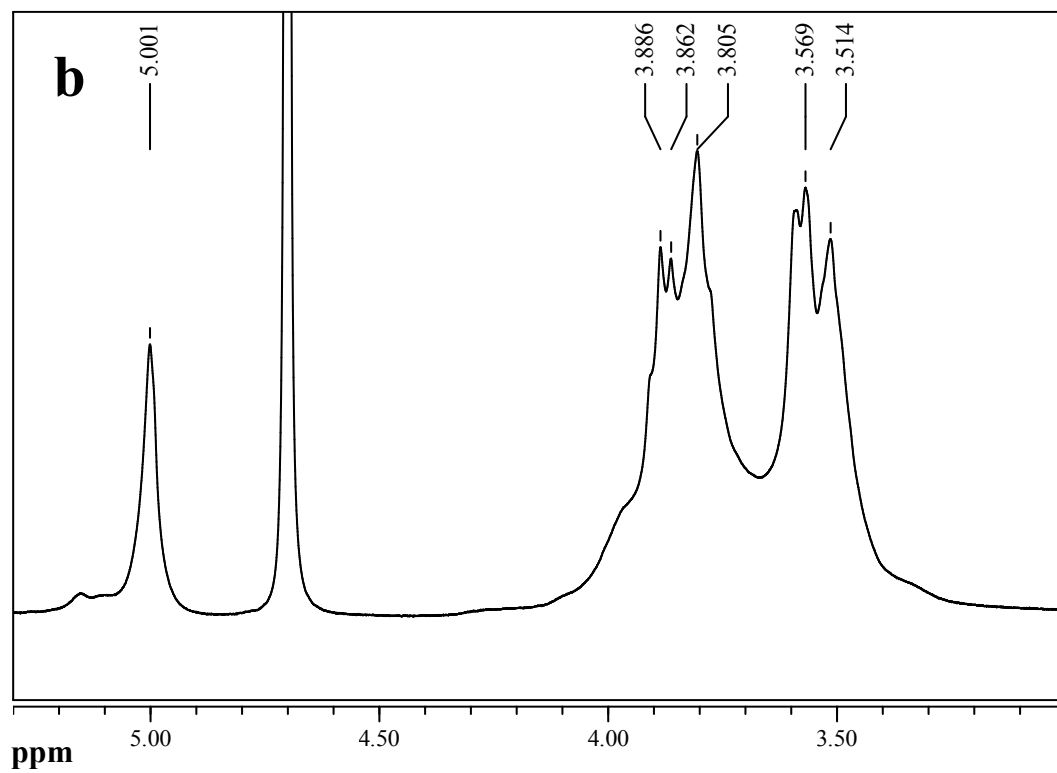

**Fig. S1**  $^1\text{H}$  NMR spectra of (a)  $\gamma$ -CDP and (b) C60- $\gamma$ -CDP.

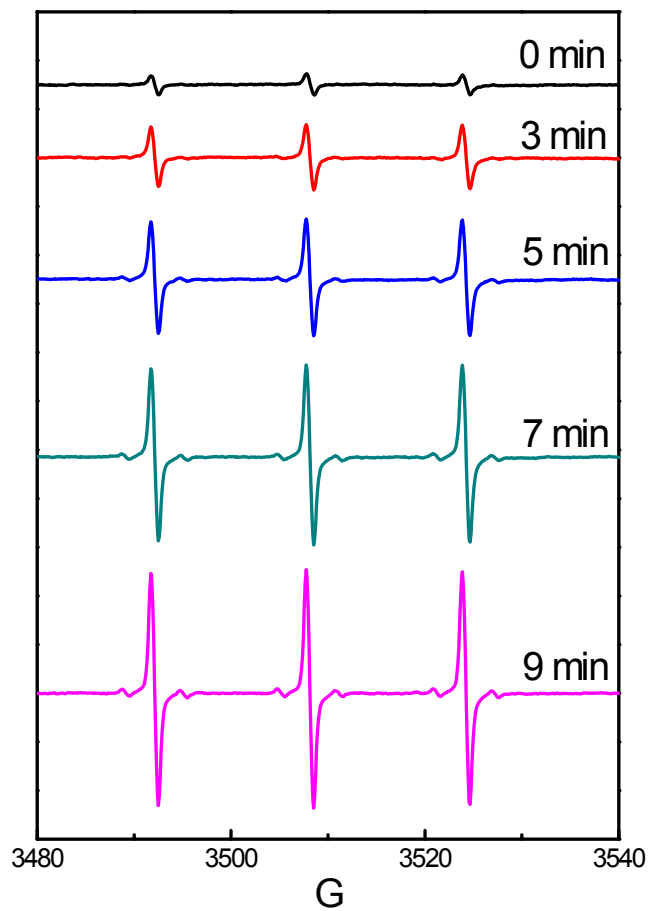

**Fig. S2** EPR spectrum of a mixture of C60- $\gamma$ -CDP with TEMP (C60 in C60- $\gamma$ -CDP: 80  $\mu$ M, TEMP: 40 mM) after UVA irradiation in a phosphate buffer solution (pH=7) at 298 K.

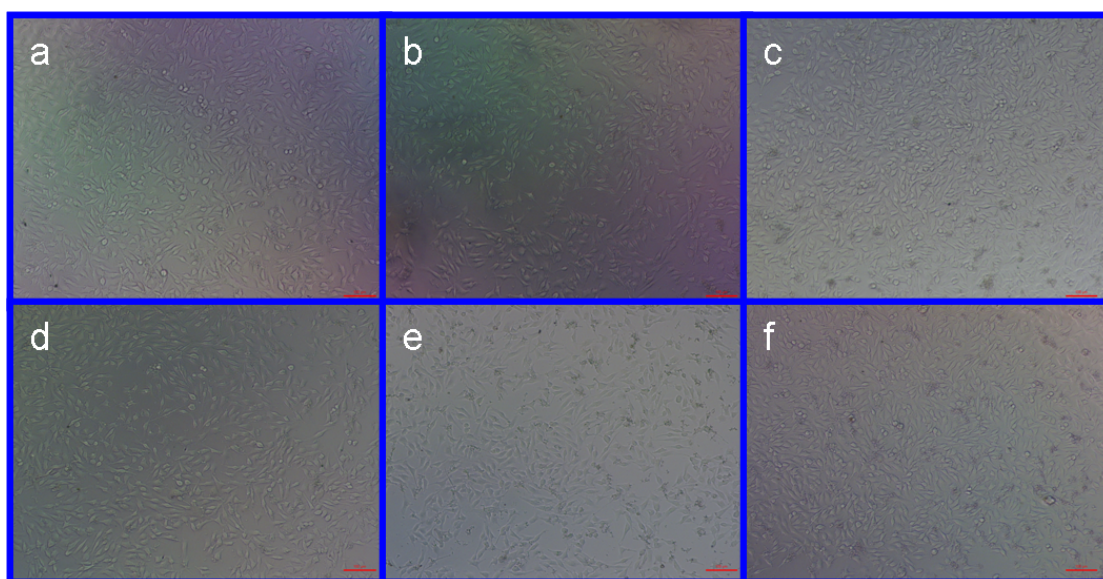

**Fig. S3** Morphological of B16-F10 cells have no changes after treatment with concentration-dependent C60- $\gamma$ -CDP for 48 h ( $\mu$ M): (a) Blank control group, (b) 20, (c) 10, (d) 5, (e) 2.5, (f) 1.

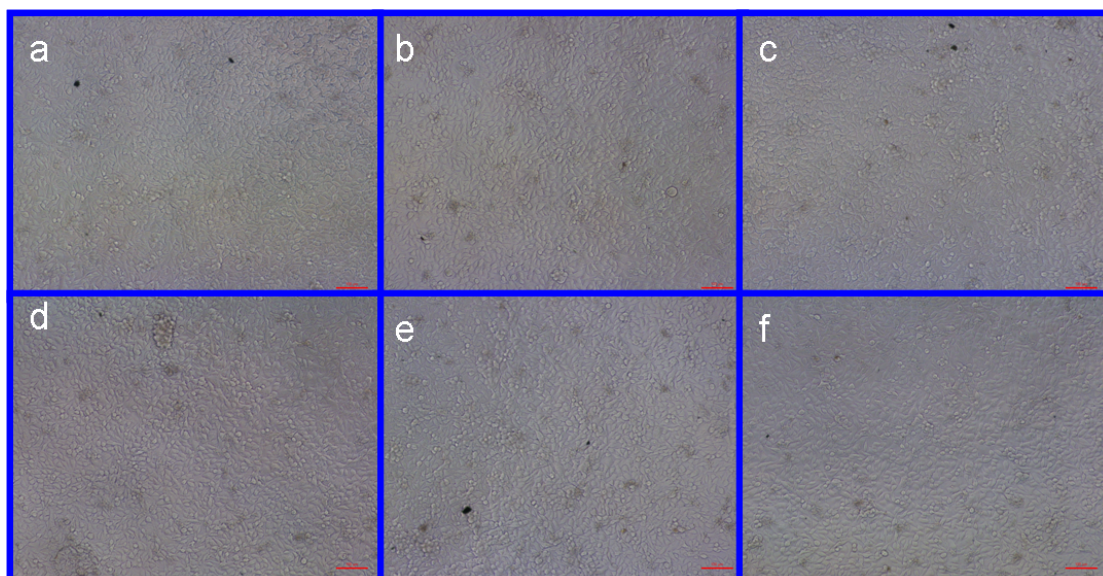

**Fig. S4** Morphological of B16-F10 cells have no changes after treatment with concentration-dependent  $\gamma$ -CDP for 48h ( $\mu$ M): (a) Blank control group, (b) 20, (c) 10, (d) 5, (e) 2.5, (f) 1.
